# Supplementary material for: Superior catalytic performance of Ce1−xBixO2−δsolid solution and Au/Ce1−xBixO2−δfor 5-hydroxymethylfurfural conversion in alkaline aqueous solution
Source: Royal Society of Chemistry journal article supplement (doi:10.1039/c4cy01060d), 2014-11-19
Supplement: c4cy01060d1.pdf [file c4cy01060d1.pdf]

# Supporting information

## Superior catalytic performance of $\text{Ce}_{1-x}\text{Bi}_x\text{O}_{2-\delta}$ solid solution and $\text{Au}/\text{Ce}_{1-x}\text{Bi}_x\text{O}_{2-\delta}$ for 5-hydroxymethylfurfural conversion in alkaline aqueous solution

Zhenzhen Miao,<sup>a,b</sup> Yibo Zhang,\*<sup>a,c</sup> Xiqiang Pan,<sup>d</sup> Tianxiao Wu,<sup>a</sup> Bin Zhang,<sup>a</sup> Jingwei Li,<sup>a,b</sup> Ting Yi,<sup>a,b</sup> Zhengdong Zhang,<sup>a</sup> and Xiangguang Yang\*<sup>a,c</sup>

<sup>a</sup> State Key Laboratory of Rare Earth Resource Utilization, Changchun Institute of Applied Chemistry, Chinese Academy of Sciences, Changchun, Jilin 130022, China. E-mail: xgyang@ciac.ac.cn, yibo Zhang@ciac.ac.cn; Tel: 86-431-8526-2228

<sup>b</sup> University of Chinese Academy of Sciences, Beijing, 100039, China.

<sup>c</sup> Laboratory of Green Chemistry and Process, Changchun Institute of Applied Chemistry, Chinese Academy of Sciences, Changchun, Jilin 130022, China.

<sup>d</sup> The Northwest Research Institute of Chemistry Industry, Xi'an, Shaanxi, 710061, China.

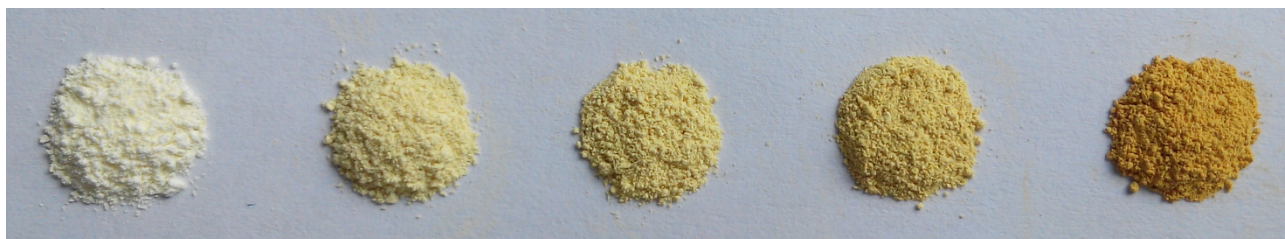

**Fig. S1**  $\text{CeO}_2$ ,  $\text{Ce}_{0.95}\text{Bi}_{0.05}\text{O}_{2-\delta}$ ,  $\text{Ce}_{0.9}\text{Bi}_{0.1}\text{O}_{2-\delta}$ ,  $\text{Ce}_{0.8}\text{Bi}_{0.2}\text{O}_{2-\delta}$  and  $\text{Ce}_{0.5}\text{Bi}_{0.5}\text{O}_{2-\delta}$  powder from left to right.

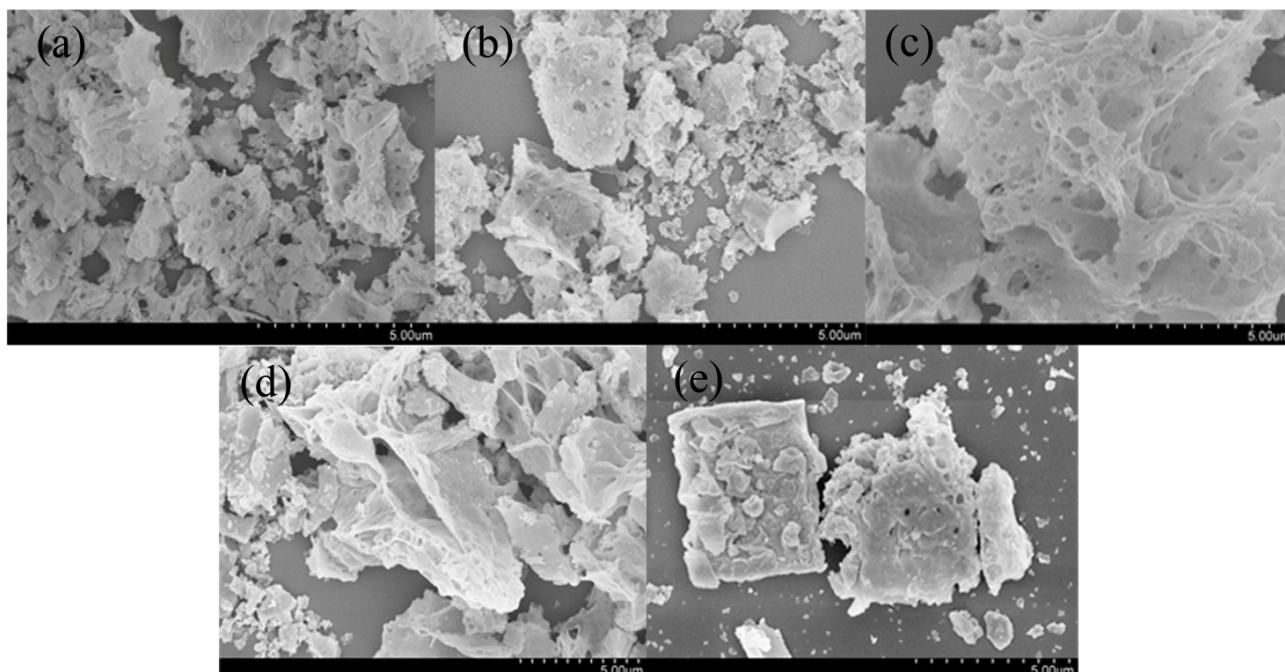

**Fig. S2** SEM images of (a)  $\text{CeO}_2$ , (b)  $\text{Ce}_{0.95}\text{Bi}_{0.05}\text{O}_{2-\delta}$ , (c)  $\text{Ce}_{0.9}\text{Bi}_{0.1}\text{O}_{2-\delta}$ , (d)  $\text{Ce}_{0.8}\text{Bi}_{0.2}\text{O}_{2-\delta}$  and (e)  $\text{Ce}_{0.5}\text{Bi}_{0.5}\text{O}_{2-\delta}$ .

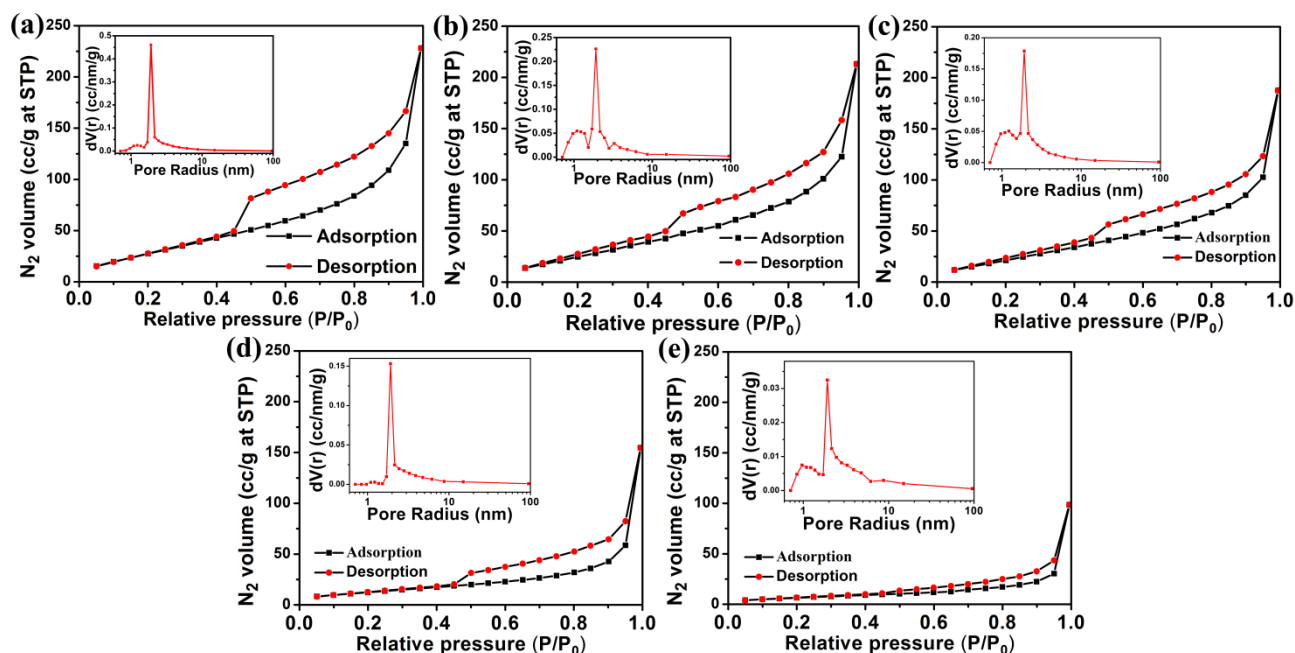

**Fig. S3**  $N_2$  adsorption isotherms and pore size distribution curves of (a)  $CeO_2$ , (b)  $Ce_{0.95}Bi_{0.05}O_{2-\delta}$ , (c)  $Ce_{0.9}Bi_{0.1}O_{2-\delta}$ , (d)  $Ce_{0.8}Bi_{0.2}O_{2-\delta}$  and (e)  $Ce_{0.5}Bi_{0.5}O_{2-\delta}$ .

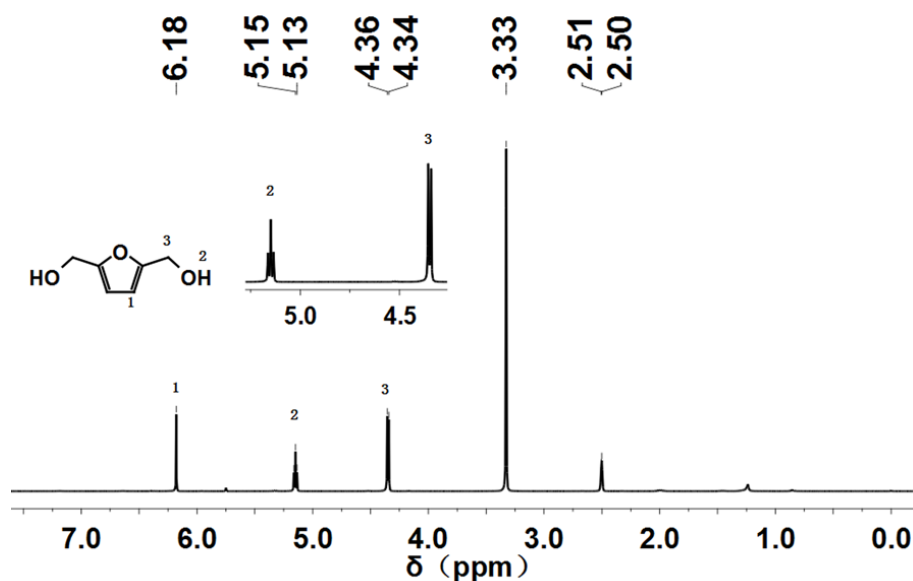

**Fig. S4**  $^1H$  NMR spectra (DMSO, 300 MHz):  $\delta$  6.18, 5.15, 4.35 belong to 2,5-bishydroxymethylfuran (BHMF),  $\delta$  3.33, 2.50 belong to DMSO solvent. (After reacted for 1 h with the presence of  $Ce_{0.875}Bi_{0.125}O_{2-\delta}$ , the resulted reaction solution was extracted by ethyl ether. The solid obtained after evaporating the ethyl ether was solved in deuterated DMSO and detected by  $^1H$  NMR.)

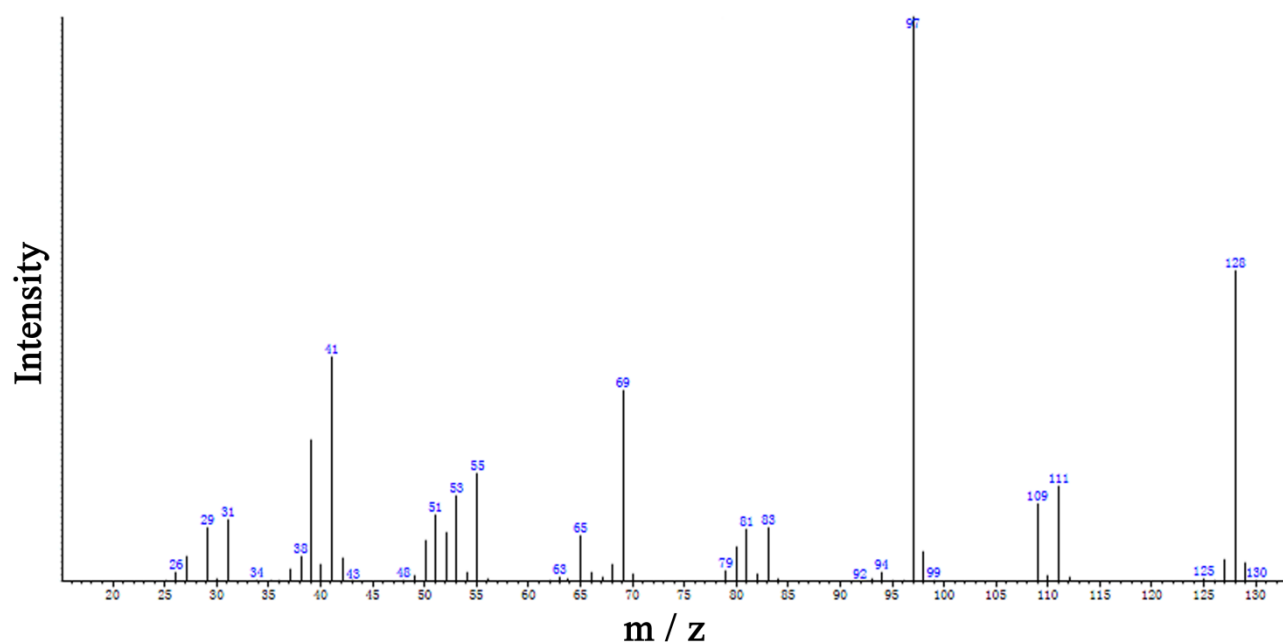

**Fig. S5** Mass spectra of BHMF obtained from gas chromatography-quadrupole mass spectrometry (GC-qMS).

After extracting the resulted reaction solution by ethyl ether, BHMF was quantitative analyzed by a Shimadzu GCMS-QP2010 Plus gas chromatograph with a quadrupole mass spectrometric detector (Shimadzu, Kyoto, Japan). An Agilent WAX capillary column (60 m  $\times$  0.25 mm, 0.25  $\mu$ m) and helium as carrier gas flowing at 1.0 ml/min were used for the separation. The GC injector port temperature was 250  $^{\circ}$ C. The oven temperature was programmed from 60  $^{\circ}$ C (3 min) to 250  $^{\circ}$ C at 10  $^{\circ}$ C /min, and then held at 250  $^{\circ}$ C for 30 min. The total analysis time was 52 min. The mass detector operated in full-scan mode with the mass/charge ratio ranging from m/z 20 to 800.

**Table S1** Screening with other M-doped  $\text{Ce}_{0.9}\text{M}_{0.1}\text{O}_{2-\delta}$

| Entry | Sample                                              | HMF Conversion (%) | $\text{Y}_{\text{FDCA}}^{\text{b}}$ (%) | $\text{Y}_{\text{HFCA}}^{\text{b}}$ (%) |
|-------|-----------------------------------------------------|--------------------|-----------------------------------------|-----------------------------------------|
| 1     | $\text{Ce}_{0.9}\text{Y}_{0.1}\text{O}_{2-\delta}$  | 93                 | 2                                       | 13                                      |
| 2     | $\text{Ce}_{0.9}\text{La}_{0.1}\text{O}_{2-\delta}$ | 93                 | 2                                       | 15                                      |
| 3     | $\text{Ce}_{0.9}\text{Mn}_{0.1}\text{O}_{2-\delta}$ | 91                 | -                                       | 7                                       |
| 4     | $\text{Ce}_{0.9}\text{Fe}_{0.1}\text{O}_{2-\delta}$ | 90                 | 2                                       | 10                                      |

<sup>a</sup> General conditions: 0.15 M HMF solution in 0.6 M NaOH (6 ml), 0.1 g catalyst, 65  $^{\circ}$ C, 1.0 MPa  $\text{O}_2$ . <sup>b</sup> Yield determined by HPLC after reacted for 1 h.

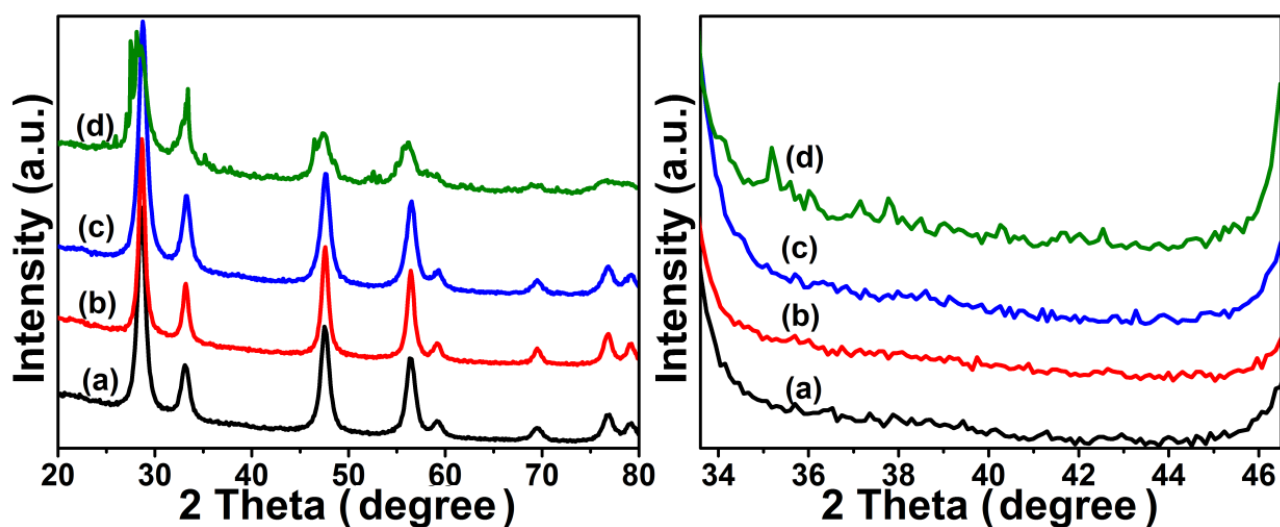

Fig. S6 XRD patterns of samples after reacted for 1h, (a) Au/CeO<sub>2</sub>, (b) Au/Ce<sub>0.9</sub>Bi<sub>0.1</sub>O<sub>2-δ</sub>, (c) Au/Ce<sub>0.8</sub>Bi<sub>0.2</sub>O<sub>2-δ</sub> and (d) Au/Ce<sub>0.5</sub>Bi<sub>0.5</sub>O<sub>2-δ</sub>. Right: partial enlarged view of the left.

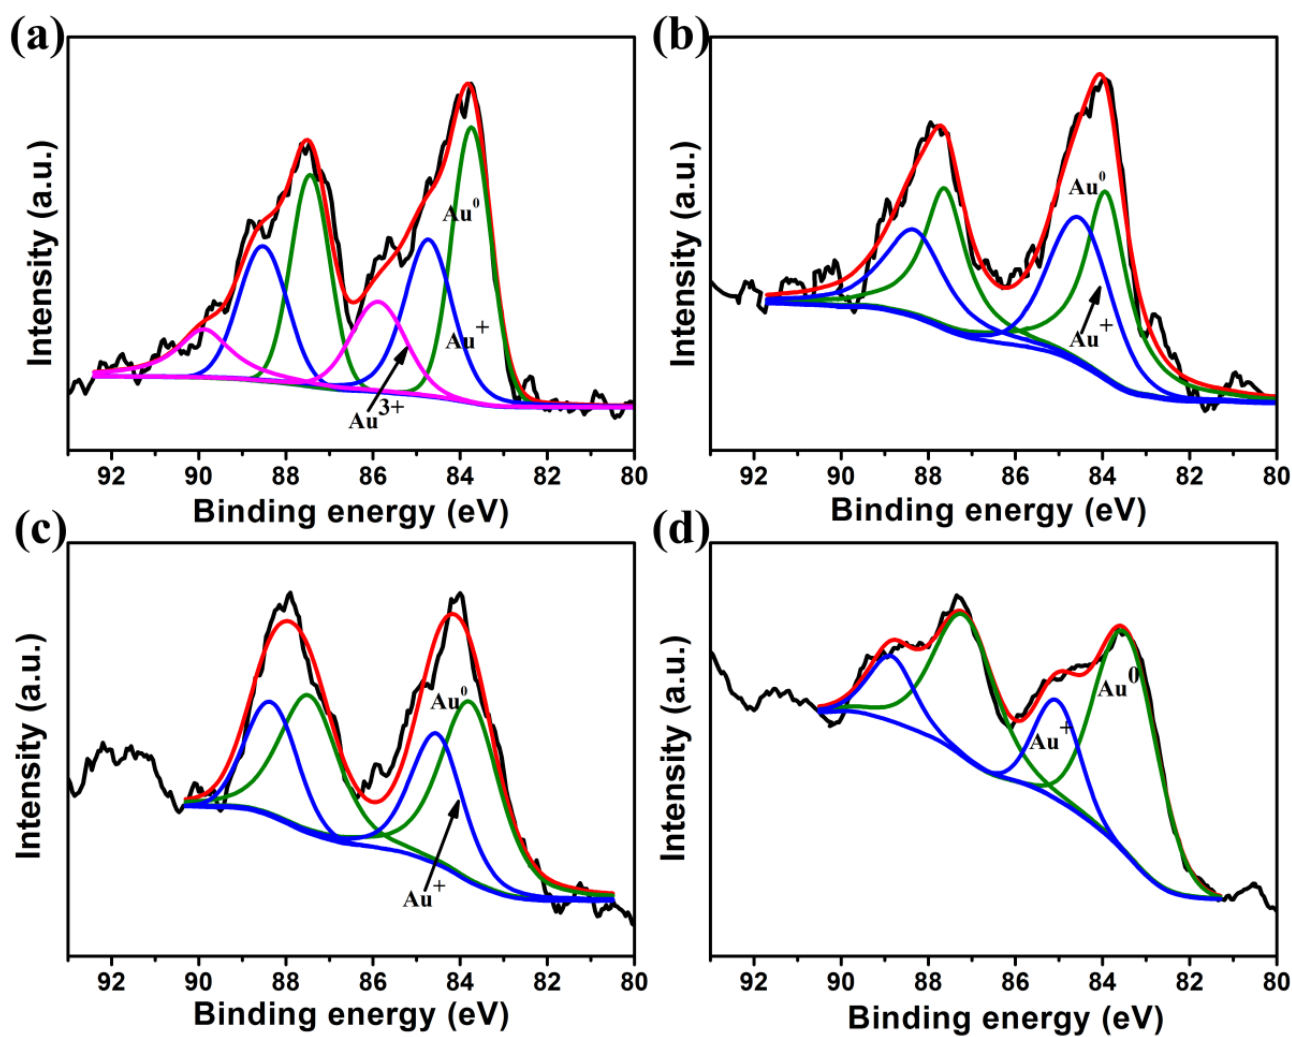

Fig. S7 XPS Au 4f peak of (a) Au/CeO<sub>2</sub>, (b) Au/Ce<sub>0.9</sub>Bi<sub>0.1</sub>O<sub>2-δ</sub>, (c) Au/Ce<sub>0.8</sub>Bi<sub>0.2</sub>O<sub>2-δ</sub> and (d) Au/Ce<sub>0.5</sub>Bi<sub>0.5</sub>O<sub>2-δ</sub> after reacted for 1h.

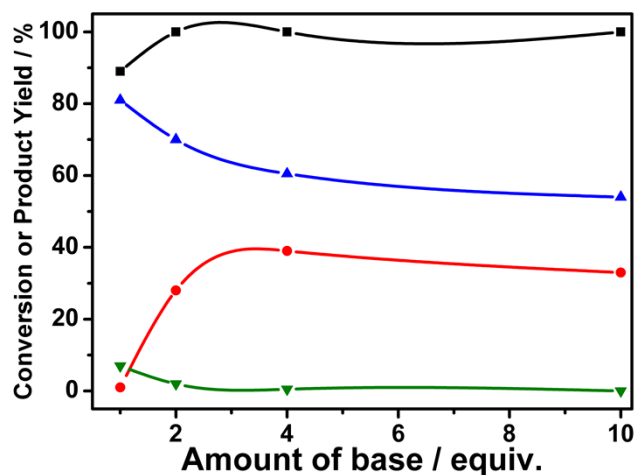

**Fig. S8** HMF conversion and product yields as a function of amount of base in the oxidation of HMF in aqueous solution over Au/Ce<sub>0.9</sub>Bi<sub>0.1</sub>O<sub>2-δ</sub> catalyst (Au : HMF = 3.33×10<sup>-3</sup> mol/mol, 1.0 MPa O<sub>2</sub>, 65 °C, 1 h; HMF: ■, FDCA: ●, HFCA: ▲, FFCA: ▼).

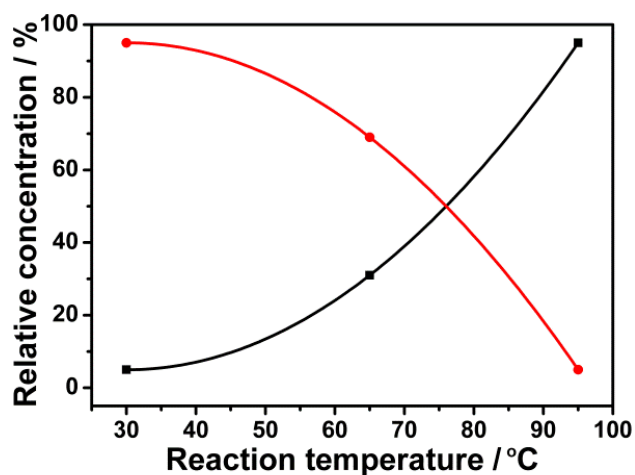

**Fig. S9** Product yields as a function of reaction temperature in the oxidation of HMF in aqueous solution over Au/Ce<sub>0.9</sub>Bi<sub>0.1</sub>O<sub>2-δ</sub> catalyst (Au : HMF = 6.67×10<sup>-3</sup> mol/mol, 4 equiv. NaOH, 1.0 MPa O<sub>2</sub>, 0.5 h; FDCA: ■, HFCA: ●).

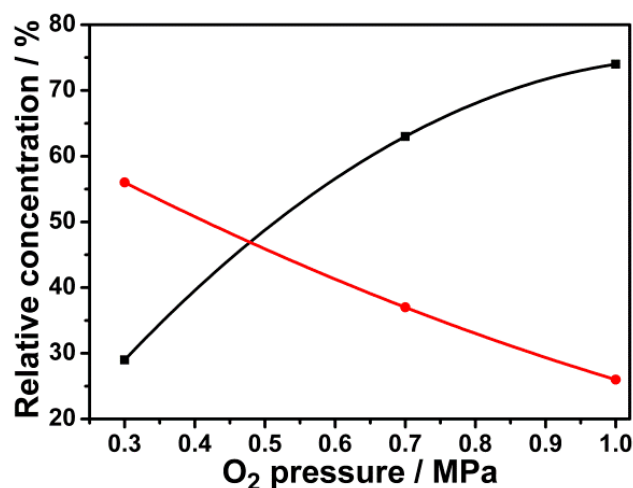

**Fig. S10** Product yields as a function of O<sub>2</sub> pressure in the oxidation of HMF in aqueous solution over Au/Ce<sub>0.9</sub>Bi<sub>0.1</sub>O<sub>2-δ</sub> catalyst (Au : HMF = 6.67×10<sup>-3</sup> mol/mol, 4 equiv. NaOH, 65 °C, 1 h; FDCA: ■, HFCA: ●).

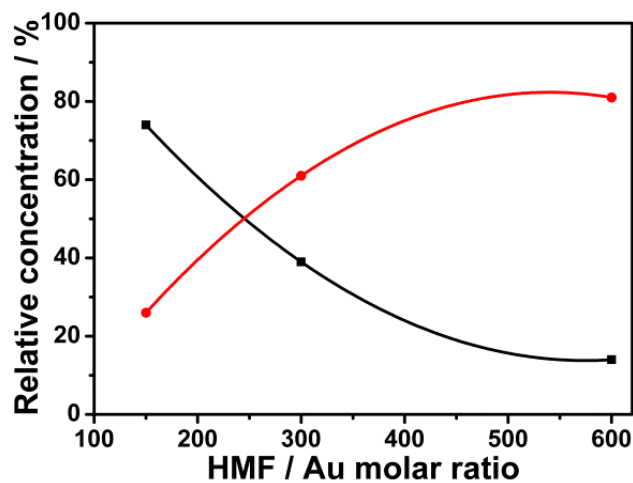

**Fig. S11** Product yields as a function of the relative amounts of HMF and Au in the oxidation of HMF in aqueous solution over Au/Ce<sub>0.9</sub>Bi<sub>0.1</sub>O<sub>2-δ</sub> catalyst (4 equiv. NaOH, 1.0 MPa O<sub>2</sub>, 65 °C, 1 h; FDCA: ■, HFCA: ●).
